# Supplementary material for: Hydration peculiarities of graphene oxides with multiple oxidation degrees
Source: Royal Society of Chemistry journal article supplement (doi:10.1039/c7cp06549c), 2017-01-01
Supplement: c7cp06549c1.pdf [file c7cp06549c1.pdf]

## **SUPPORTING INFORMATION**

### **Hydration Peculiarities of Graphene Oxides with Multiple Oxidation Degrees**

Antenor Neto<sup>1</sup>, Vitaly V. Chaban,<sup>2</sup> and Eudes E. Fileti<sup>3</sup>

<sup>1</sup> Centro de Ciências Naturais e Humanas, Universidade Federal do ABC, 09210-170, Santo André, SP, Brazil.

<sup>2</sup> P.E.S., Vasilievsky Island, Saint Petersburg, Russian Federation.

<sup>3</sup> Instituto de Ciência e Tecnologia, Universidade Federal de São Paulo, 12231-280, São José dos Campos, SP, Brazil.

**\*Corresponding author.** e-mail: fileti@gmail.com. Fax: +55 12 3924 9500

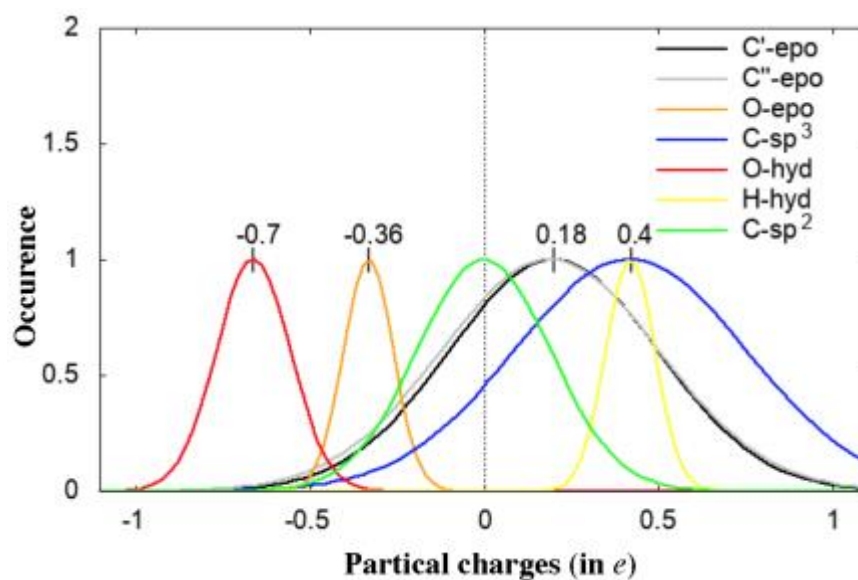

**FIGURE S1:** Distributions and average charges obtained on all similar atoms for each of the graphene oxides.

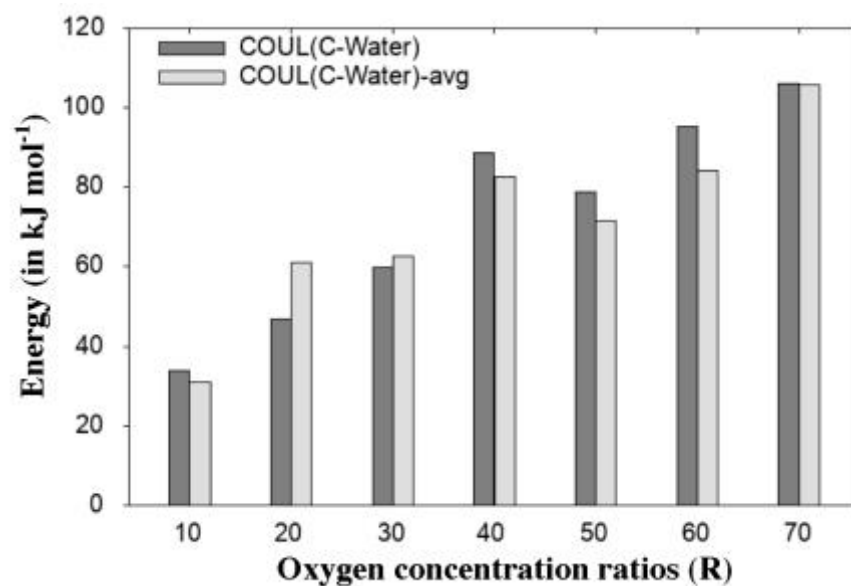

**FIGURE S2:** Comparison between carbon-water Coulomb interaction energies obtained with both charge sets; CHELPG (dark bars) and average charges (light bars).

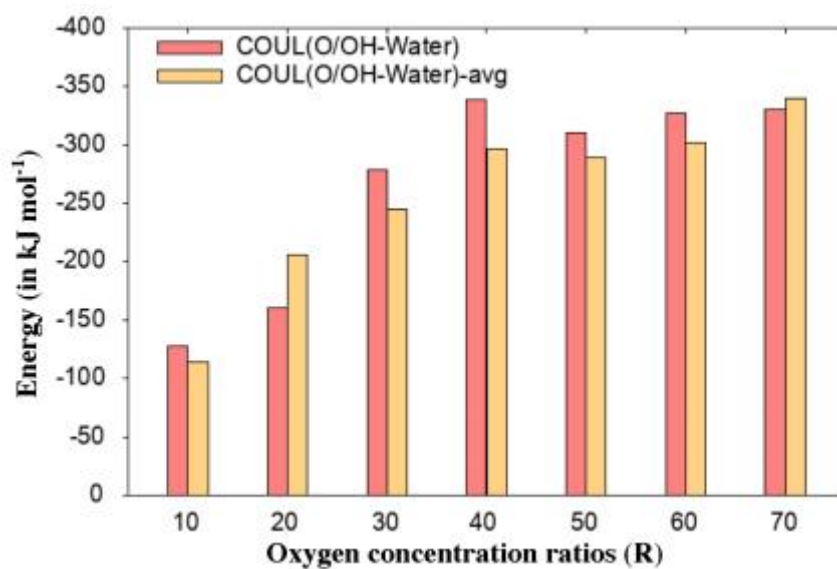

**FIGURE S3:** Comparison between O/OH-water Coulomb interaction energies obtained with both charge sets; CHELPG (dark bars) and average charges (light bars).

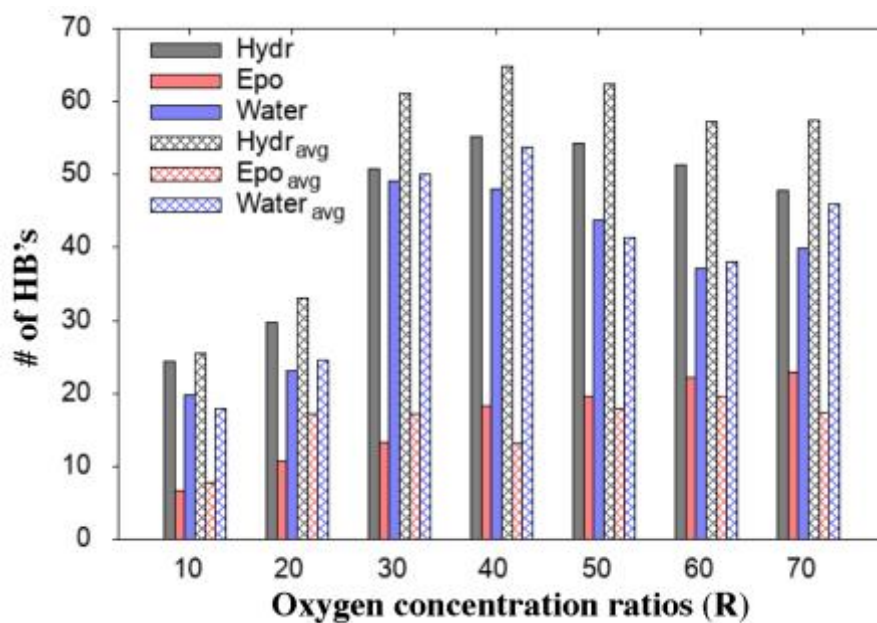

**FIGURE S4:** Average number of hydrogen bonds obtained with both charge sets; CHELPG (solid bars) and average charges (traced bars).

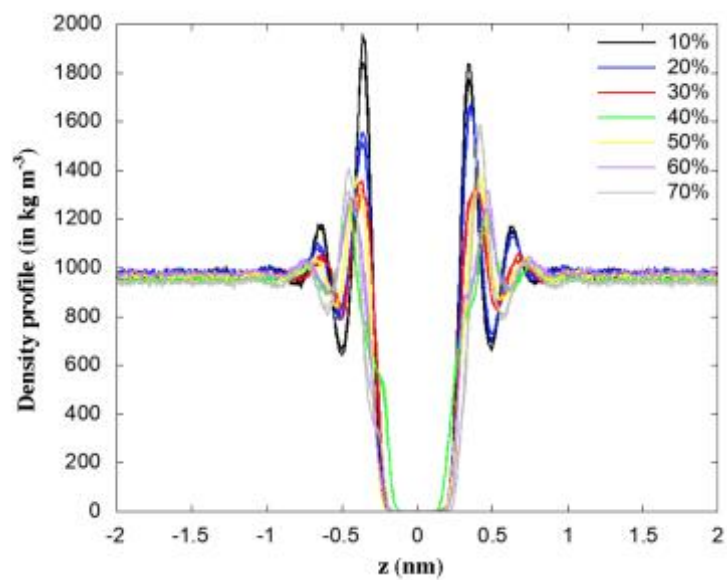

**FIGURE S5:** Profile of mass density for each oxygen concentration ration.
